# Supplementary material for: Balancing supramolecular reagents for reliable formation of co-crystals
Source: Royal Society of Chemistry journal article supplement (doi:10.1039/b517118k), 2006-01-01
Supplement: b517118k.pdf [file b517118k.pdf]

## Supplementary Material for:

# Balancing supramolecular reagents for reliable formation of co-crystals

Department of Chemistry, Kansas State University, Manhattan, KS, 66506  
E-mail: [aakeroy@ksu.edu](mailto:aakeroy@ksu.edu)

Christer B. Aakeröy,\* John Desper and Benjamin M.T. Scott

## Experimental

### *Synthesis*

#### Synthesis of 4-(1*H*-1-pyrazolylmethyl)benzonitrile

To a round-bottomed flask, pyrazole (1.5g, 22.1mmol) and THF (80ml) were added. To this solution, NaOH pellets (8.82g, 221mmol) were added and the reaction was stirred at room temperature. After two hrs,  $\alpha$ -Bromo-4-tolunitrile (4.32g, 22.1mmol) in THF (80ml) was added and the reaction mixture stirred at room temperature overnight. On completion, water was added to dissolve any excess NaOH. The organic layer was separated, dried over MgSO<sub>4</sub> and the solvent removed under vacuum to yield a white solid (3.358g, 83.3%). Mp: 71-73°C. <sup>1</sup>H NMR ( $\delta_{\text{H}}$ ; 400MHz, CDCl<sub>3</sub>): 5.392 (s, 2H), 6.339 (t,  $J = 2.2\text{Hz}$ , 1H), 7.234-7.254 (d,  $J = 8\text{Hz}$ , 2H), 7.442-7.448 (d,  $J = 2.4\text{Hz}$ , 1H), 7.581-7.586 (d,  $J = 2\text{Hz}$ , 1H), 7.615-7.636 (d,  $J = 8.4\text{Hz}$ , 2H); IR (KBr): 3111, 2939, 2223, 1619, 1500, 1447, 1387, 1275, 1076, 1036, 950, 824, and 744 cm<sup>-1</sup>.

#### Synthesis of 4-(1*H*-1-pyrazolylmethyl)benzamide, **1**

To a round-bottomed flask, 4-(1*H*-1-pyrazolylmethyl)benzonitrile (2.858g, 15.60mmol) and 85% H<sub>2</sub>SO<sub>4</sub> (12ml) were added. The mixture was heated to 80°C and stirred. After four hours, the solution was poured slowly over ice. The resulting brown solution was adjusted to basic pH using 5M NaOH. The aqueous solution was washed with CHCl<sub>3</sub> and the organic extracts were separated, dried over MgSO<sub>4</sub> and reduced to a white solid (2.627g, 83.7%). Mp: 154-156°C. <sup>1</sup>H NMR, ( $\delta_{\text{H}}$ ; 400MHz, CDCl<sub>3</sub>): 5.400 (s, 2H), 5.570 (s, 1H), 6.020 (s, 1H), 6.330 (t,  $J = 4\text{ Hz}$ ,  $J = 2\text{ Hz}$ , 1H), 7.260-7.280 (d,  $J = 8\text{Hz}$ , 2H), 7.430-7.436 (d,  $J = 2.4\text{Hz}$ , 1H), 7.586-7.590 (d,  $J = 1.6\text{Hz}$ , 1H), 7.779-7.800 (d,  $J = 4.4\text{Hz}$ , 2H); IR (KBr): 3370, 3171, 3018, 2925, 1659, 1407, 1301, 1142, 923, and 758 cm<sup>-1</sup>.
